# Supplementary material for: Three-dimensional ZnO nanodendrite/nanoparticle composite solar cells
Source: Royal Society of Chemistry journal article supplement (doi:10.1039/c0jm03481a), 2011-01-01
Supplement: c0jm03481a.pdf [file c0jm03481a.pdf]

## **Electronic Supplementary Information**

### **Three-Dimensional ZnO Nanodendrite/Nanoparticle Composite Solar Cells**

Chun-Te Wu, Wen-Pin Liao and Jih-Jen Wu\*

Department of Chemical Engineering, National Cheng Kung University, Tainan 701,

Taiwan

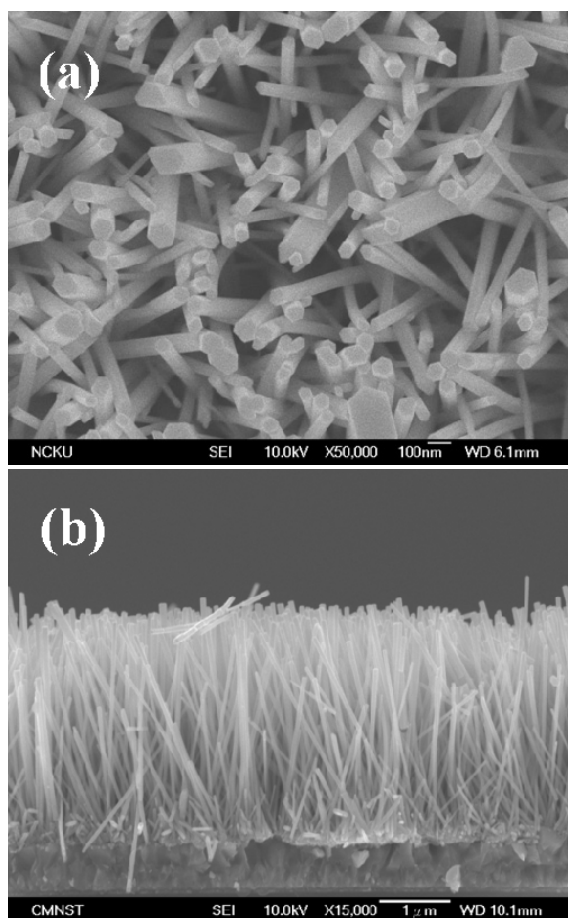

**Figure S1** (a) Top-view and (b) cross-sectional SEM images of the ZnO NW array on FTO substrate.

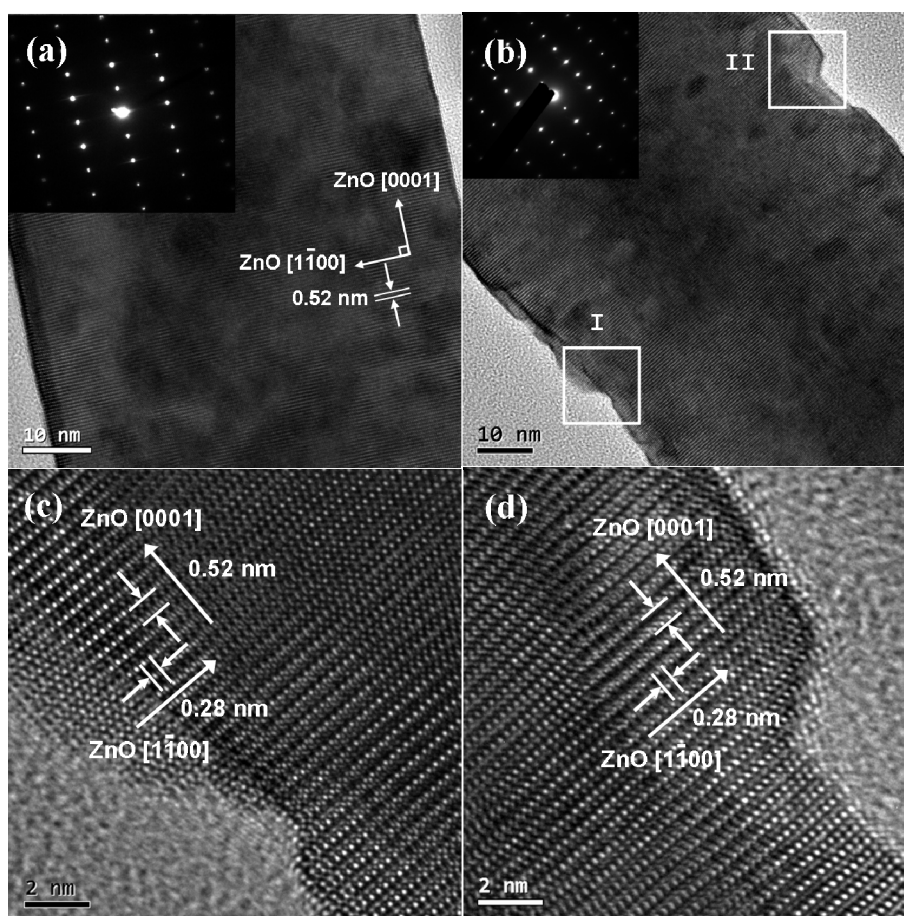

**Figure S2** (a) HRTEM image and the corresponding SAED of the as-prepared ZnO NW. (b) HRTEM image and the corresponding SAED of the ZnO NW after immersed in the limpid solution of 0.057 M ZnAc $\cdot$ 2H $_2$ O and 0.5 M NaOH at room temperature for 2 min. (c) and (d) HRTEM images of regions (I) and (II) in (b), respectively.

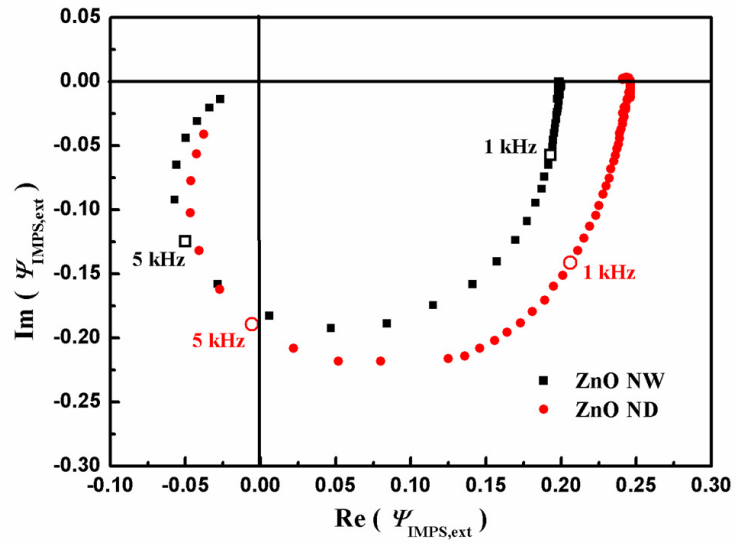

**Figure S3** IMPS responses of the ZnO NW and ZnO ND DSSCs. The spectra were taken under an illumination of 530 nm and  $90 \text{ mWcm}^{-2}$
